# Supplementary material for: Granular Insights: Neutrophil Predominance and Elastase Release in Severe Asthma Exacerbations in a Pediatric Cohort
Source: MDPI journal article supplement (doi:10.3390/cells13060533), 2024-03-18
Supplement: s1 [file s1]

Supplementary Table S1. Patient Past History and Exposures

| <i>Variables</i>                                      | PICU<br>(N)       | ER<br>(N)          |
|-------------------------------------------------------|-------------------|--------------------|
| <i>Previous hospital admission to the floor (% 0)</i> | 25%<br>(N = 16)   | 25%<br>(N = 8)     |
| <i>Previous hospital admission to the ICU (% 0)</i>   | 56%<br>(N = 18)   | 75%<br>(N = 8)     |
| <i>Systemic corticosteroid use (Median)</i>           | 2x/yr<br>(N = 17) | 2.5x/yr<br>(N = 7) |
| <i>Smoke exposure (% Yes)</i>                         | 35%<br>(N = 17)   | 28%<br>(N = 7)     |
